# Supplementary material for: Interaction between M. tuberculosis Lineage and Human Genetic Variants Reveals Novel Pathway Associations with Severity of TB
Source: Pathogens. 2021 Nov 15;10(11):1487. doi: 10.3390/pathogens10111487 (PMC8617877; doi:10.3390/pathogens10111487)
Supplement: Supplementary file 1 [file pathogens-10-01487-s001.zip › Supp Fig and Table S2.pdf]

**Supplemental Figure S1. Manhattan Plot for Interaction Between SNP and L4.6/Ugandan Lineage in Cohort 1**

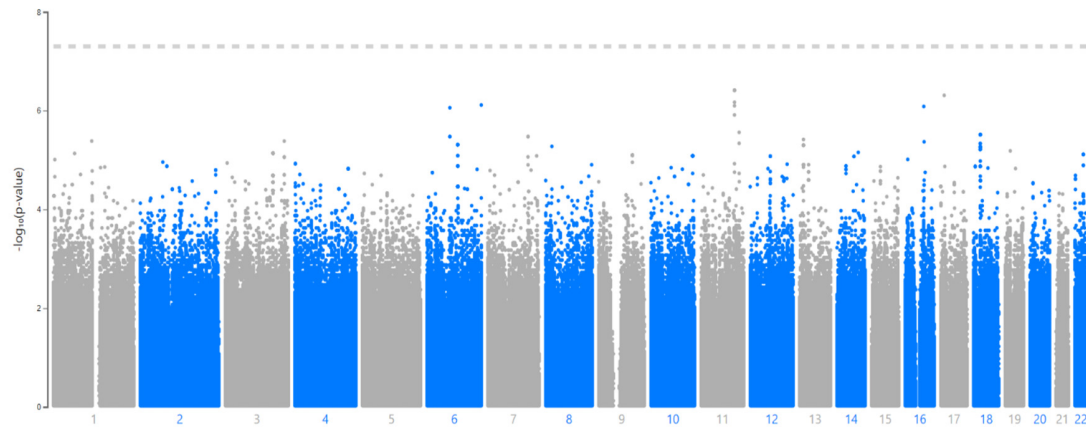

The Manhattan plot shows the inverse log(10) of the p-values for the association between interaction of each SNP and the L4.6/Ugandan lineage and TBscore on the y-axis and the x-axis represent the physical location of each SNP on the chromosomes, which are in order from 1-22.

**Supplemental Figure S2. Manhattan Plot for Interaction Between SNP and L4.6/Ugandan Lineage in Cohort 2**

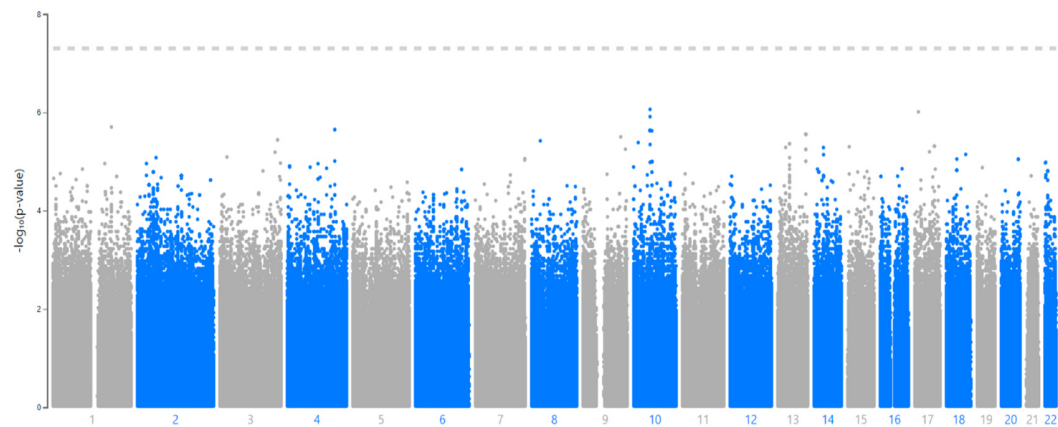

The Manhattan plot shows the inverse  $\log(10)$  of the p-values for the association between interaction of each SNP and the L4.6/Ugandan lineage and TBscore on the y-axis and the x-axis represent the physical location of each SNP on the chromosomes, which are in order from 1-22.

**Supplemental Figure S3. Quantile-Quantile Plot for Interaction Between SNP and  
L4.6/Ugandan Lineage in Cohort 1**

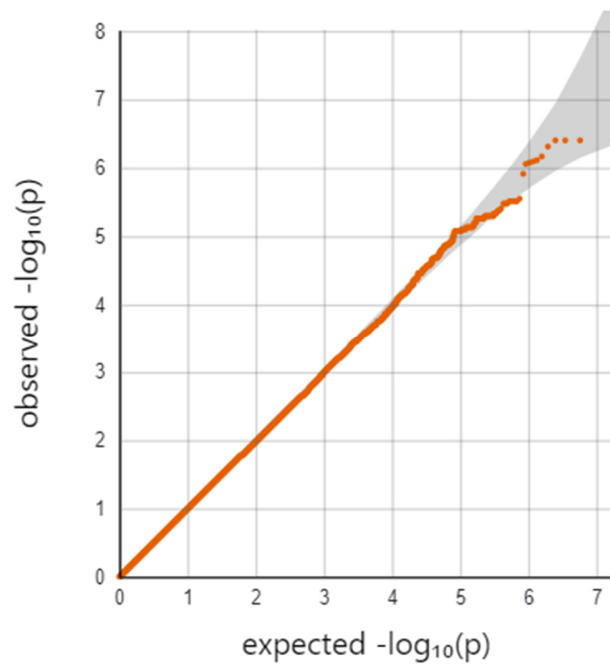

The quantile-quantile (Q-Q) plot shows the inverse log(10) of the observed p-values on the Y-axis relative to what is expected if there was no association on the x-axis. Deviations above the line indicate an association with the outcome. If the line deviates at the low quantiles, then this is considered evidence to suggest genome-wide inflation of the test statistics, which typically indicates unmeasured confounding.

#### Supplemental Figure S4. Quantile-Quantile Plot for Interaction Between SNP and

#### L4.6/Ugandan Lineage in Cohort 2

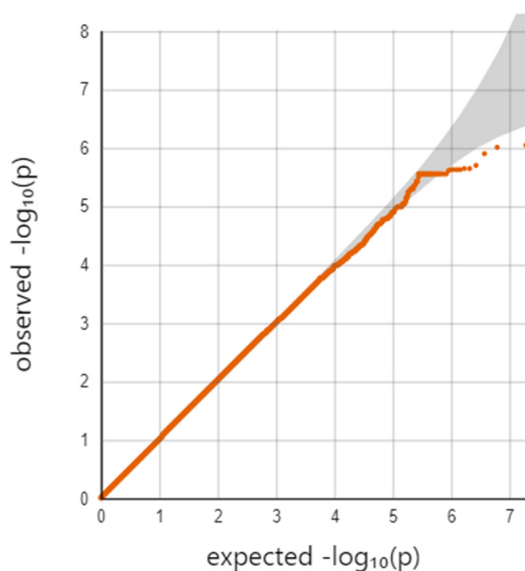

The quantile-quantile (Q-Q) plot shows the inverse log(10) of the observed p-values on the Y-axis relative to what is expected if there was no association on the x-axis. Deviations above the line indicate an association with the

outcome. If the line deviates at the low quantiles, then this is considered evidence to suggest genome-wide inflation of the test statistics, which typically indicates unmeasured confounding.

**Supplemental Table S2. Top SNPs from Original Analysis Compared to Summary Statistics From Sensitivity Analysis Including only HIV- Subjects**

| CHR | BP        | SNP         | P (HIV-) | $\beta$ (HIV-) | P (All)  | $\beta$ (All) |
|-----|-----------|-------------|----------|----------------|----------|---------------|
| 21  | 20187488  | rs114945555 | 3.13E-07 | -4.16          | 4.00E-08 | -4.13         |
| 5   | 17775271  | rs369093426 | 1.20E-06 | 3.34           | 9.82E-07 | 3.21          |
| 5   | 121258204 | rs761904408 | 7.61E-06 | 3.15           | 8.14E-07 | 3.04          |
| 8   | 50958714  | rs203964    | 3.31E-06 | 2.73           | 1.70E-07 | 2.71          |
| 8   | 141085471 | rs56990580  | 3.35E-06 | -3.28          | 1.77E-07 | -3.32         |
| 13  | 98589842  | rs8000063   | 1.23E-05 | 2.66           | 9.82E-07 | 2.62          |
| 21  | 20182990  | rs112560854 | 2.03E-06 | -3.76          | 2.58E-07 | -3.78         |
